**Table 1.** Summary of data on respiratory tract infections caused by penicillin-resistant *Pasteurella multocida*.

| Case no. [ref] | Age (y), sex | Underlying disease               | Animal exposure | Type(s) of infection     | Culture specimen(s)   | Antimicrobial treatment (duration)                                                         | Outcome                      |
|----------------|--------------|----------------------------------|-----------------|--------------------------|-----------------------|--------------------------------------------------------------------------------------------|------------------------------|
| 1 [1]          | 63, M        | Chronic pulmonary histoplasmosis | Swine, cattle   | Lung abscess, empyema    | Pleural fluid, sputum | Amp; Pen                                                                                   | Death (72 h after admission) |
| 2 [2]          | 80, M        | Pulmonary tuberculosis           | Dog             | Pneumopathy              | Bronchial aspirate    | Amox (2 d); Amox/Clv (13 d)                                                                | Death (13 d)                 |
| 3 [3]          | 65, F        | Chronic bronchitis               | NS              | Bronchial superinfection | Bronchial aspirate    | NS                                                                                         | NS                           |
| 4 [4]          | 76, M        | Chronic bronchitis               | None            | Empyema                  | Pleural fluid         | Gm and Cm; Pen; Amox/Clv                                                                   | Recovery                     |
| 5 [PR]         | 75, F        | Chronic bronchitis               | Cat             | Lung abscess             | BAL fluid             | Amox (8 d);<br>Amox, Mtz, and Gm (4 d);<br>Amox/Clv, Mtz, and Gm (7 d);<br>Amox/Clv (2 mo) | Recovery                     |

NOTE. Amox, amoxicillin; Amp, ampicillin; BAL, bronchoalveolar lavage; Clv, clavulanate; Cm, clindamycin; Gm, gentamicin; Mtz, metronidazole; Pen, penicillin; NS, not specified; PR, present report.

- Klein NC, Cunha BA. *Pasteurella multocida* pneumonia. *Semin Respir Infect* **1997**; 12:54–6.
- Livrelli V, Peduzzi J, Joly B. Sequence and molecular characterization of the ROB-1  $\beta$ -lactamase gene from *Pasteurella haemolytica*. *Antimicrob Agents Chemother* **1991**; 35:242–51.
- Rosenau A, Labigne A, Escande F, Courcoux P, Philippon A. Plasmid-mediated ROB-1  $\beta$ -lactamase in *Pasteurella multocida* from a human specimen. *Antimicrob Agents Chemother* **1991**; 35:2419–22.
- Mortensen JE, Giger O, Rodgers GL. In vitro activity of oral antimicrobial agents against clinical isolates of *Pasteurella multocida*. *Diagn Microbiol Infect Dis* **1998**; 30:99–102.
- Goldstein EJC, Citron DM, Gerardo SH, Hudspeth M, Merriam CV. Activities of HMR 3004 (RU 64004) and HMR 3647 (RU 66647) compared to those of erythromycin, azithromycin, clarithromycin, roxithromycin and eight other antimicrobial agents against unusual aerobic and anaerobic human and animal bite pathogens isolated from skin and soft tissue infections in humans. *Antimicrob Agents Chemother* **1998**; 42:1127–32.

### Lethal Infection Due to *Armillifer armillatus* (Porocephalida): A Snake-Related Parasitic Disease

Snake-related deaths are usually caused by bites and result from venom neurotoxicity. We report an unusual snake-related death to draw attention to the fact that other mechanisms of death caused by snakes may be overlooked.

A 26-year-old Congolese man was found dead in his family's home in Paris where he was staying. One week before his death, he came to Paris from Congo for medical advice on unexplained symptoms, including right leg paresis with abnormal movements of the 4 extremities, atypical seizures, and dysarthria. He was admitted to the hospital. Physical examination revealed no objective signs. Results of MRI, CT, electromyography, electroencephalography, CSF analysis, and other biological tests were normal. Depression was diagnosed. The patient was treated with antidepressant drugs and discharged from the hospital.

His unexpected death was considered suspicious; therefore, a medicolegal autopsy was performed. At autopsy, we found ~100 small white wormlike parasites (averaging 2 cm in length) in the lungs, liver, mesentery, and intestine (figure 1). The brain and spine were normal, as were other organs. No evidence of

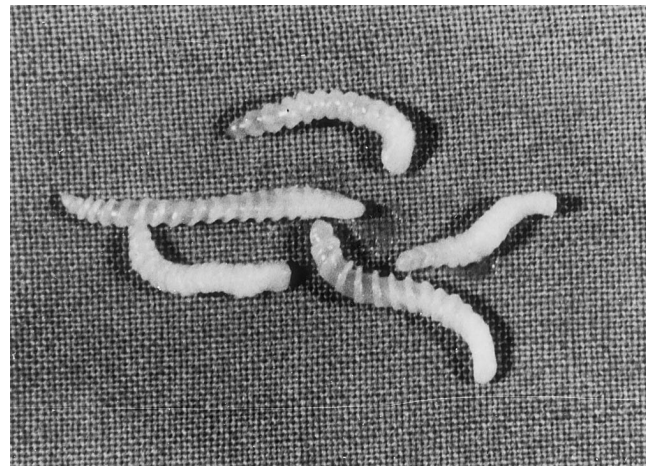

**Figure 1.** Nymphs of third-stage larvae of *Armillifer armillatus* with pseudoannulation that were obtained during autopsy of a man infected with these endoparasites (original size,  $\times 2$ ).

another disease was found during the complete autopsy. Toxicology analyses were negative.

The parasites were identified as nymphs of third-stage larvae of *Armillifer armillatus*, an invertebrate parasite belonging to the order Porocephalida. These parasites are similar to individuals belonging to the phyla Annelida and Arthropoda, but they are now classified as Crustacea.

Two species are essentially involved in human infections [1–3]: *A. armillatus*, which is predominant in tropical Africa,

Reprints or correspondence: Dr. Véronique Lavarde, Department of Parasitology, Broussais Hospital, 96, rue Didot, 75014 Paris, France.

**Clinical Infectious Diseases** 1999;29:1346–7

© 1999 by the Infectious Diseases Society of America. All rights reserved.  
1058-4838/1999/2905-0052\$03.00

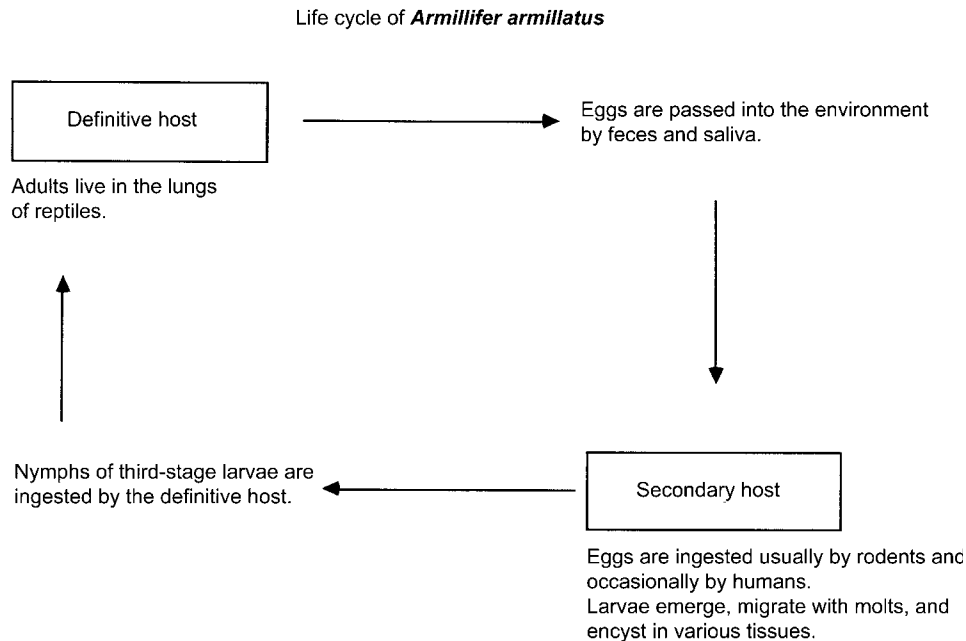

**Figure 2.** Life cycle of *Armillifer armillatus*

and *Linguatula serrata*, which is predominant in the Middle East. Male and female adults of *A. armillatus* live in the respiratory tract of reptiles, where they become attached by means of their hooks and suck blood and other tissues. Eggs are thrown out into the environment and infect the intermediate host (rodents); after a series of molts, third-stage larvae are encapsulated and then ingested by the definitive host, in whom they migrate to the respiratory tract to develop. Humans are dead-end hosts (figure 2).

Most reports of human porocephaliasis are from West Africa and Congo, but some cases have also been reported in Asia; risk factors for humans are consumption of food or drink contaminated by eggs of reptiles and contact with snake flesh or skin. In North America, where the incidence of porocephaliasis among crotalid snakes is high, human infections by these parasites are very rare. Only one case has been described in an emigrant from Nigeria [2].

The incidence of this parasitic disease is likely to be underestimated, because *Armillifer* is a usually well-tolerated parasite and most patients are asymptomatic. Patients are infected only by 1–12 nymphs. The main sites of involvement are the lungs, liver, and mesentery. Parasites are discovered during autopsy or surgery or are evidenced during radiological examination as calcified C-shaped nymphs. Some clinical symptoms can arise when encysted larvae pressure or perforate organs during larval migration. The diagnosis of the disease is then made during

surgical operation. Larvae can cause intestinal occlusion, peritonitis, pericarditis, pneumonia, or meningitis.

Death is exceptional, resulting from massive infection following ingestion of a female full of eggs. Hypersensitivity or toxin release by parasites might be suggested as a possible mechanism for neurological signs and death, as in our patient, when destruction of multiple disseminated larvae occurs. Only 3 lethal cases, including our case, have been reported in the literature [4]. No medical treatment is available. Surgery is often necessary when complications occur. In areas where *A. armillatus* is endemic, precautions are washing food and cautious handling of snakes.

**Véronique Lavarde<sup>1</sup> and Paul Fornes<sup>2</sup>**

<sup>1</sup>Department of Parasitology, Broussais Hospital, and <sup>2</sup>Institute of Forensic Medicine and Department of Forensic Sciences, College of Medicine Cochin Port-Royal, University of Paris (V), Paris, France

#### References

1. Self JT, Hopps HC, Olufemi Williams A. Pentastomiasis in Africans. *Trop Geogr Med* **1975**;27:1–13.
2. Guardia SN, Sepp H, Scholten T, Morava-Protzner I. Pentastomiasis in Canada. *Arch Pathol Lab Med* **1991**;115:515–7.
3. Drabick JJ. Pentastomiasis. *Rev Infect Dis* **1987**;9:1087–94.
4. Faisy C, Boye B, Blatt A, Boutes P, Iloumbou J. La porocéphalose, parasitose méconnue revue de la littérature à propos d'un cas congolais. *Med Trop (Mars)* **1995**;55:258–62.
